# Supplementary material for: A CGE (Computable General Equilibrium) Assessment of FTA (Free Trade Agreement) Between Tunisia and the EU (European Union) Under Oligopolistic Market Structures
Source: Oxford University Press journal article supplement (doi:10.1242/jeb.165282), 2003-01-01
Supplement: jeb165282supp.pdf [file jeb165282supp.pdf]

**Table S1** - Shearing angles measured during dorsal and ventral flexion of four common dolphins and subsequent calculations as illustrated in Figures 1, 2 and 3 and described in text.

[Click here to Download Table S1](#)
